# Supplementary material for: Association between Body Image Dissatisfaction and Self-Rated Health, as Mediated by Physical Activity and Eating Habits: Structural Equation Modelling in ELSA-Brasil
Source: MDPI journal article supplement (doi:10.3390/ijerph15040790), 2018-04-18
Supplement: s1 [file s1]

## Association between Body Image Dissatisfaction and Self-Rated Health, as Mediated by Physical Activity and Eating Habits: Structural Equation Modelling in ELSA-Brasil

Patricia de Oliveira da Silva <sup>1</sup>, Joanna Miguez Nery Guimarães <sup>1</sup>, Rosane Härter Griep <sup>2</sup>, Enirtes Caetano Prates Melo <sup>1</sup>, Sheila Maria Alvim Matos <sup>3</sup>, Maria del Carmem Molina <sup>4</sup>, Sandhi Maria Barreto <sup>5</sup> and Maria de Jesus Mendes da Fonseca <sup>1,\*</sup>

**Table S1:** Body image of subjects according to self-rated health. Baseline of ELSA-Brasil, 2008–2010.

| Variables - n (%)           | Very good   | Good        | Fair        | Poor      |
|-----------------------------|-------------|-------------|-------------|-----------|
| <b>Men</b>                  |             |             |             |           |
| <b>Body image</b>           |             |             |             |           |
| Satisfied                   | 475 (36.9)  | 633 (49.1)  | 170 (13.2)  | 10 (0.8)  |
| Dissatisfied at being<br>LI | 198 (25.7)  | 419 (54.4)  | 137 (17.8)  | 16 (2.1)  |
| Dissatisfied at being<br>HI | 1091 (23.3) | 2569 (54.9) | 938 (20.1)  | 79 (1.7)  |
| <b>Women</b>                |             |             |             |           |
| <b>Body image</b>           |             |             |             |           |
| Satisfied                   | 368 (41.7)  | 396 (44.8)  | 104 (11.8)  | 15 (1.7)  |
| Dissatisfied at being<br>LI | 94 (25.5)   | 183 (49.6)  | 86 (23.3)   | 6 (1.6)   |
| Dissatisfied at being<br>HI | 1892 (27.8) | 3503 (51.6) | 1235 (18.2) | 165 (2.4) |
